# Supplementary material for: N-truncated Aβ4–x peptides in sporadic Alzheimer’s disease cases and transgenic Alzheimer mouse models
Source: Springer Nature journal article supplement (doi:10.1186/s13195-017-0309-z), 2017-10-04

## Supplementary information:

### Additional File 1: Figure S1

Antibody 029-1 showed high selectivity for A $\beta$  peptides starting with the Phe residue in position 4. Synthetic A $\beta$  peptides with different N-termini were analyzed by capillary isoelectric focusing immunoassay. Mixtures of A $\beta$ <sub>1-40</sub>, A $\beta$ <sub>2-40</sub> and A $\beta$ <sub>5-40</sub> (top electropherogram), A $\beta$ <sub>3-40</sub> (second electropherogram), A $\beta$ <sub>pE3-40</sub> (third electropherogram) and A $\beta$ <sub>4-40</sub> (bottom electropherogram) were subjected to isoelectric focusing in microcapillaries and probed with antibodies 6E10 (**A**) or 029-1 (**B**).

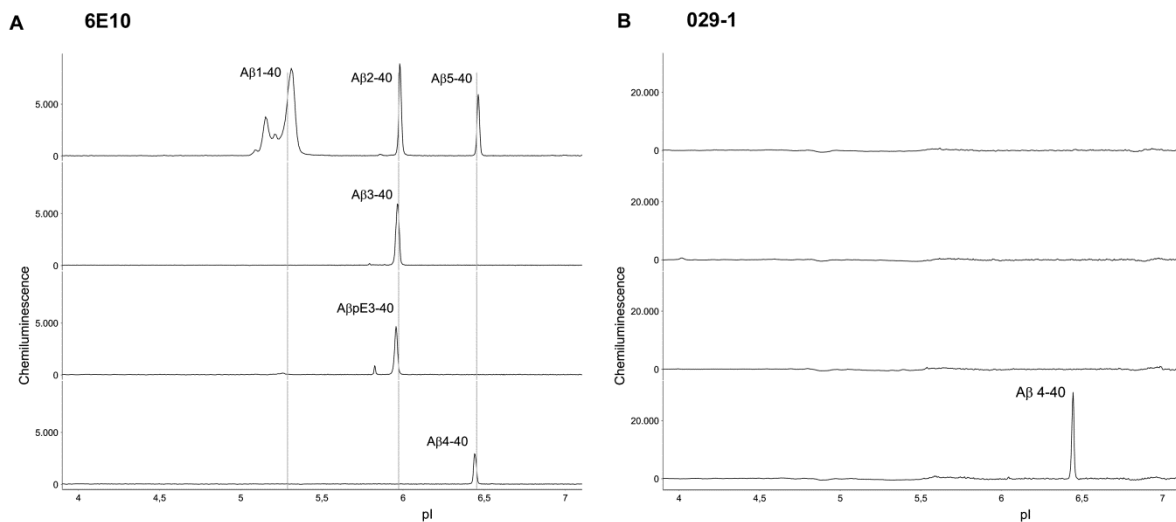

Supplement: MOESM1 [file 15108240]
