# Supplementary material for: N-truncated Aβ4–x peptides in sporadic Alzheimer’s disease cases and transgenic Alzheimer mouse models
Source: Springer Nature journal article supplement (doi:10.1186/s13195-017-0309-z), 2017-10-04

## Additional File 2: Figure S2

Quantification of extracellular 029-1 positive plaque load in cortex, subiculum and thalamus in heterozygous and homozygous 9-month-old 5XFAD mice.

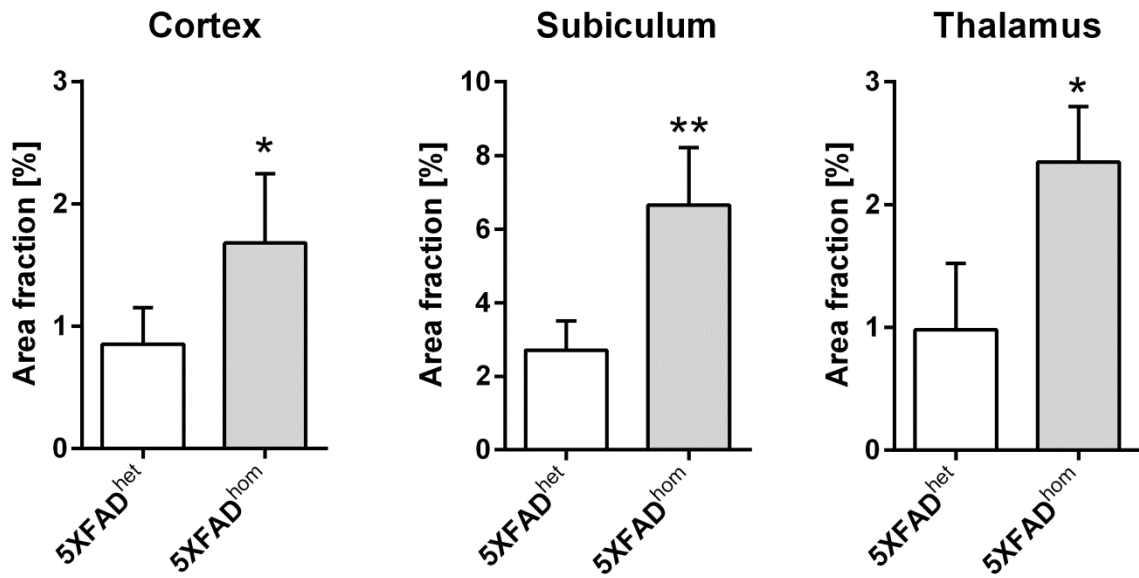

Supplement: MOESM2 [file 15108240]
