# Supplementary material for: N-truncated Aβ4–x peptides in sporadic Alzheimer’s disease cases and transgenic Alzheimer mouse models
Source: Springer Nature journal article supplement (doi:10.1186/s13195-017-0309-z), 2017-10-04

### Additional File 3: Figure S3

Example showing predominant labelling of the plaque core using 029-2 (purple) in a sporadic AD patient while IC16 labels also more diffuse portions of amyloid plaques (green). As secondary antibodies, donkey-anti-mouse DyLight488 (green, Thermo Fisher Scientific) and goat-anti-guinea pig DyLight650 (purple, Thermo Fisher Scientific) were used. Scale bar: 33  $\mu\text{m}$

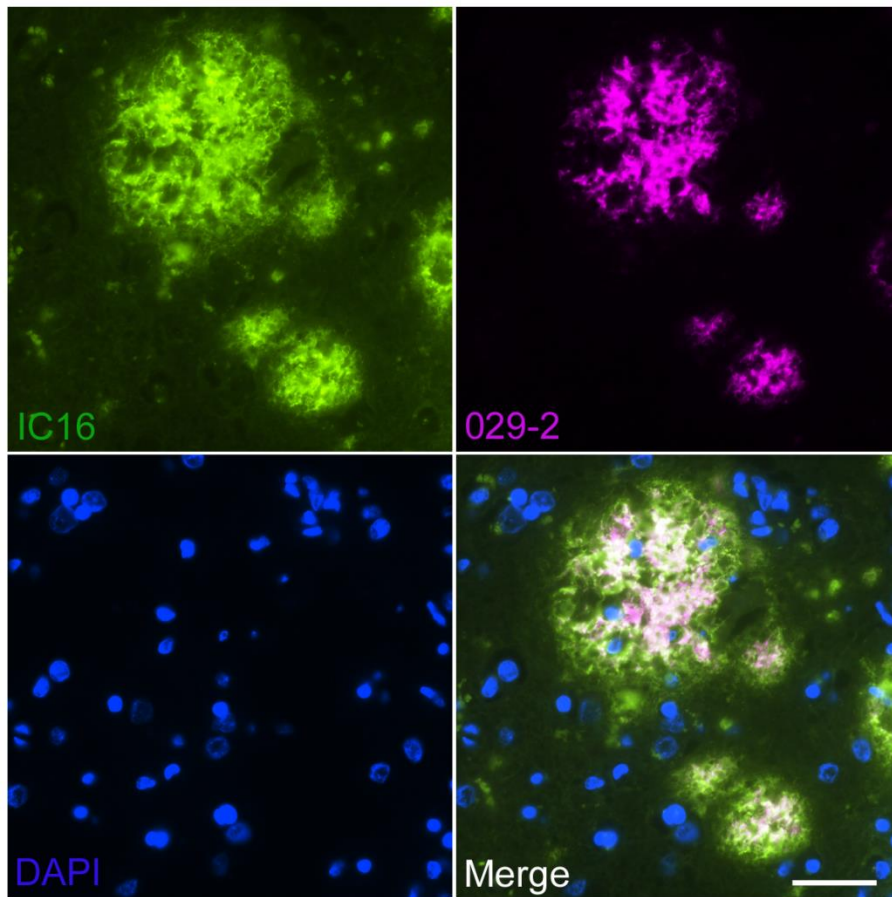

Supplement: MOESM3 [file 13195_2017_309_MOESM3_ESM.pdf]
